# Supplementary material for: Adsorption-photoreduction behaviors and mechanisms of layered double hydroxide loaded on uranium(vi) removal
Source: Royal Society of Chemistry journal article supplement (doi:10.1039/d3dt01289a), 2023-01-01
Supplement: d3dt01289a1.pdf [file d3dt01289a1.pdf]

## **Adsorption-photoreduction behaviors and mechanisms of layered double hydroxide loaded on uranium(VI) removal**

Qian Ling, Peiling Kuang, Xin Zhong<sup>\*</sup>, Baowei Hu<sup>\*</sup>

School of Life and Environmental Science, Shaoxing University, Huancheng West

Road 508, Shaoxing 312000, P.R. China

Corresponding author e-mail:

Xin Zhong: [zhongxinmagic@163.com](mailto:zhongxinmagic@163.com)

Baowei Hu: [hbw@usx.edu.cn](mailto:hbw@usx.edu.cn)

## 1. The calculation formula

The adsorption data were simulated by the pseudo-first-order and the pseudo second-order models and Langmuir and Freundlich models by Eq. (1-5), respectively.

$$\ln(q_e - q_t) = \ln q_e - k_1 t \quad (1)$$

$$\frac{t}{q_t} = \frac{1}{k_2 q_e^2} + \frac{t}{q_e} \quad (2)$$

$$q_t = k_p t^{1/2} + C \quad (3)$$

$$q_e = \frac{K_L q_{\max} C_e}{K_L C_e + 1} \quad (4)$$

$$q_e = K_F C_e^{1/n} \quad (5)$$

Where,  $q_t$  (mg/g) and  $q_{\max}$  (mg/g) were the amount of U(VI) at contact time and the theoretical maximum adsorption capacity, respectively.  $k_1$  ( $\text{min}^{-1}$ ) and  $k_2$  (g/mg·min) were separately the rate constants of kinetic models, as well as  $K_L$  (L/mg) and  $K_F$  ( $\text{mg}^{1-1/n} \cdot \text{g}^{-1} \cdot \text{L}^{-1/n}$ ) were the equilibrium constants of Langmuir and Freundlich models, respectively.

The change of Gibbs free energy ( $\Delta G^0$ ), entropy ( $\Delta S^0$ ) and enthalpy ( $\Delta H^0$ ) were calculated by Eq. (6-8).

$$\Delta G^0 = -RT \ln K_0 \quad (6)$$

$$\Delta G^0 = \Delta H^0 - T \Delta S^0 \quad (7)$$

$$\ln K_0 = \frac{\Delta S^0}{R} - \frac{\Delta H^0}{RT} \quad (8)$$

Where,  $K_0$  was the thermodynamic equilibrium constant;  $R$  was the ideal gas constant 8.314 J/(mol·K) and  $T$  was absolute temperature (K).

## 2. Figures

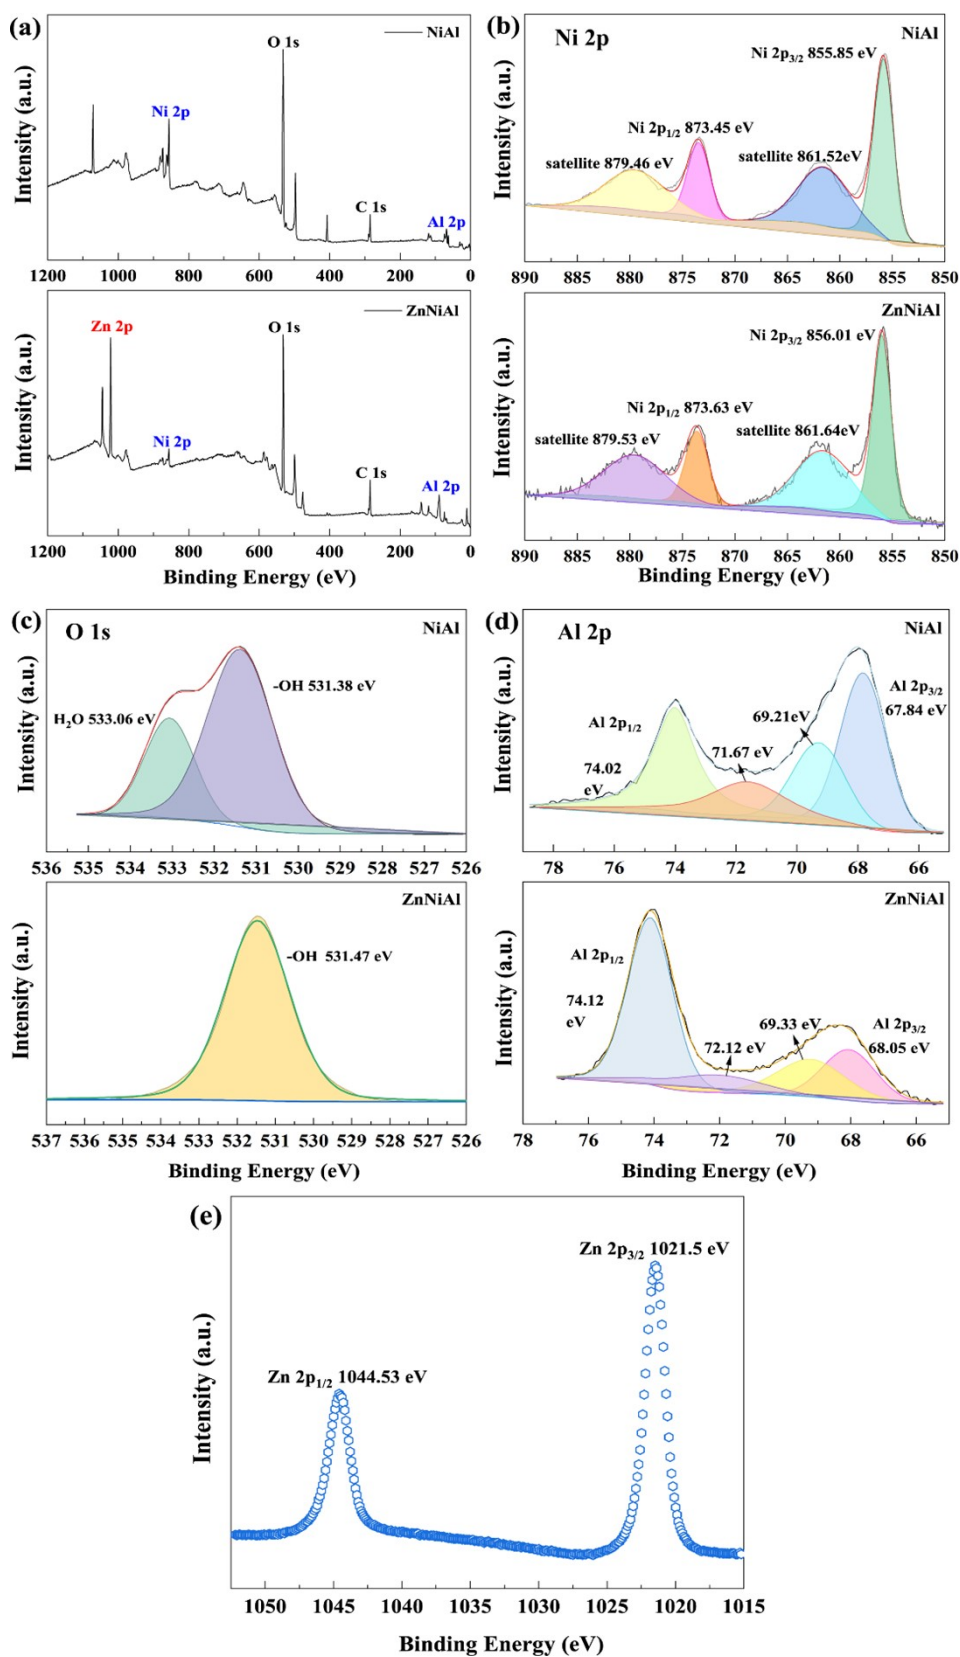

Fig. S1 The high-resolution XPS spectra of NiAl and ZnNiAl: (a) survey (b) Ni 2p, (c) O 1s, (d) Al 2p and (e) Zn 2p.

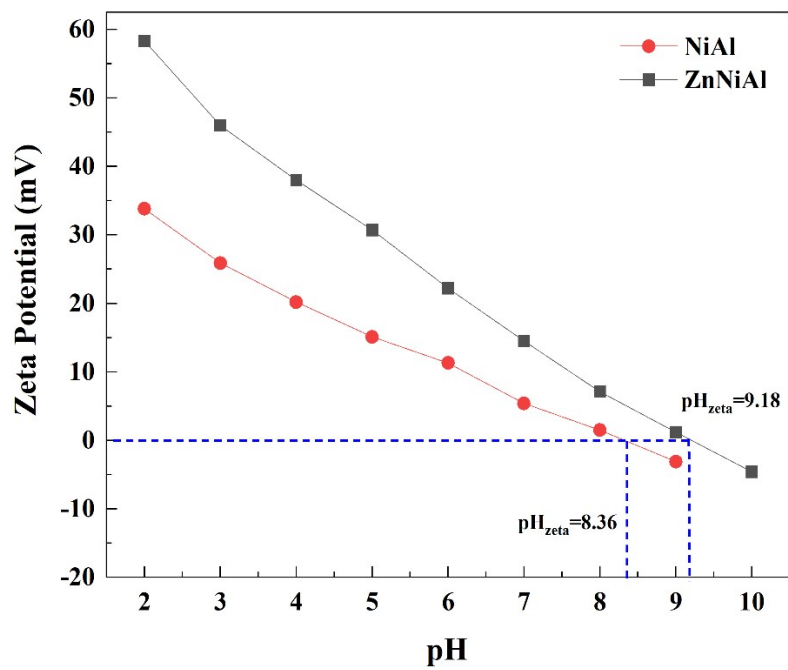

Fig. S2 The positive zeta potential value of NiAl and ZnNiAl.

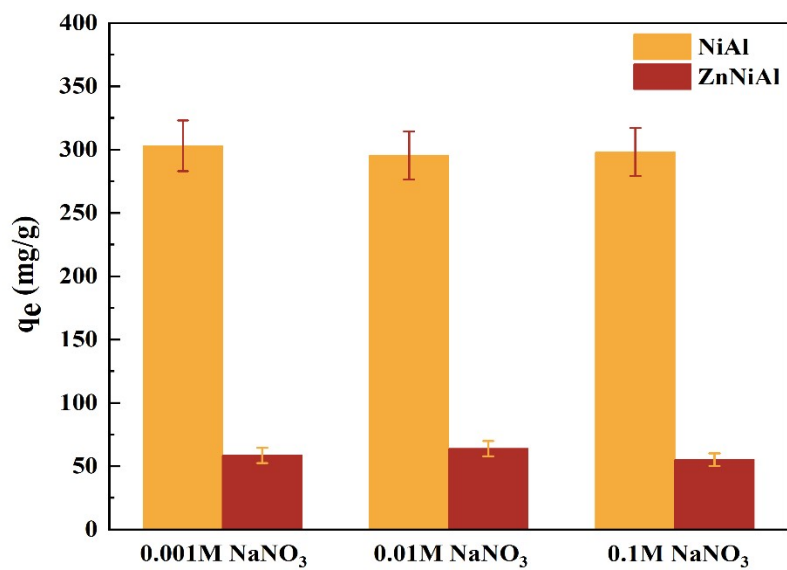

Fig. S3 The different concentrations of  $\text{NaNO}_3$  on U(VI) adsorption over NiAl and ZnNiAl.

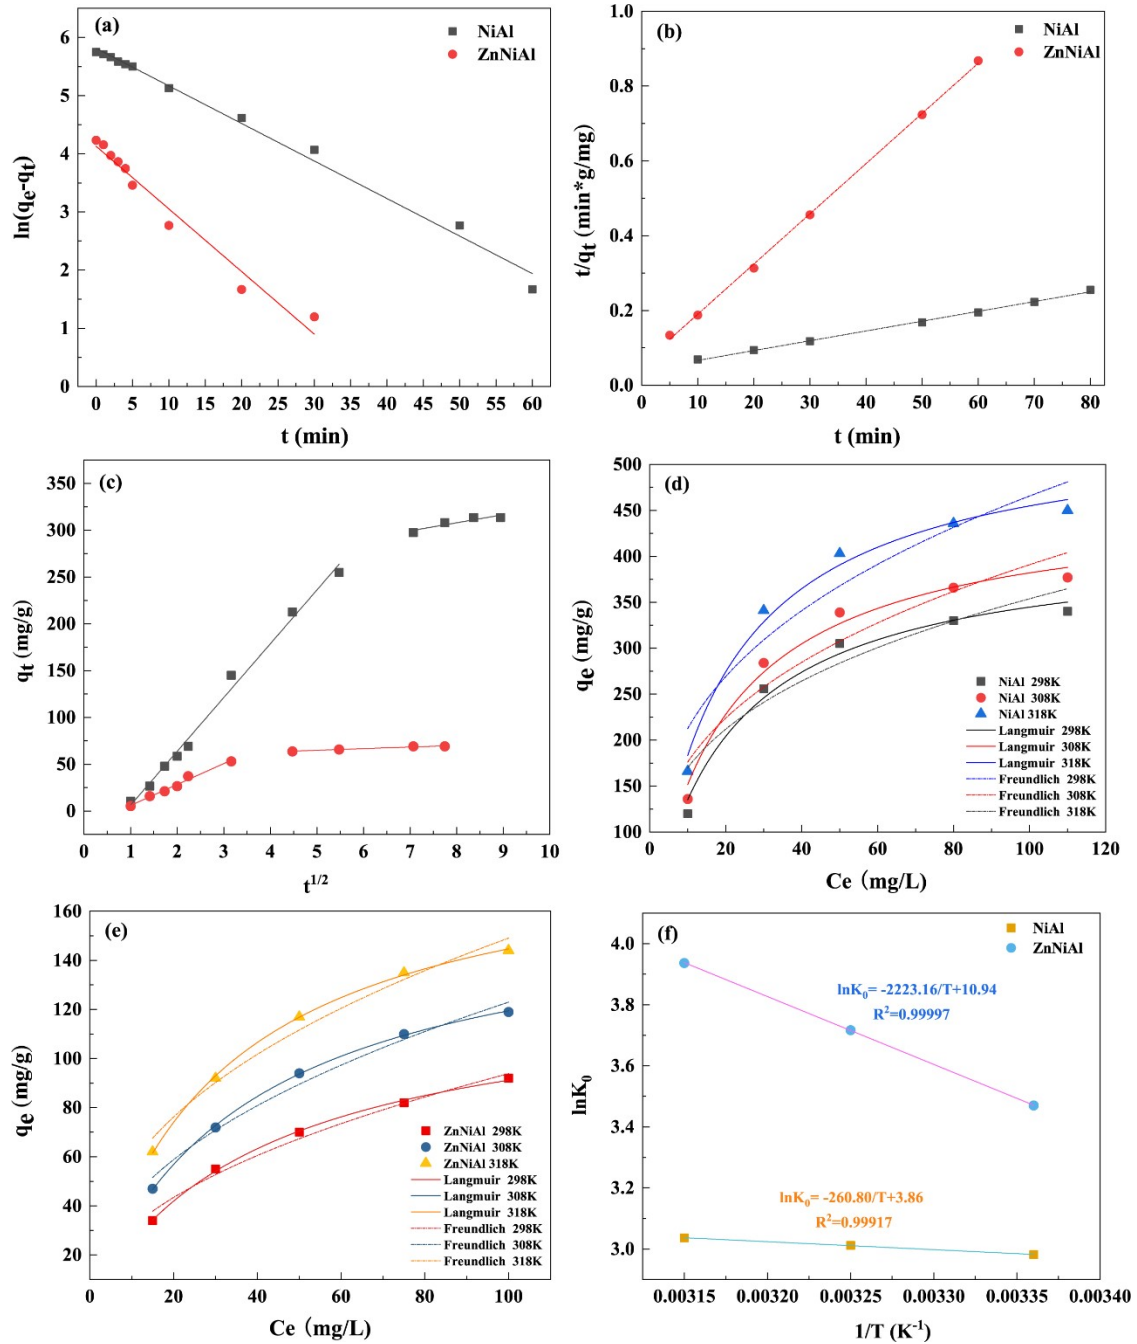

Fig. S4 The adsorption kinetics of U(VI) ( $C_0=50$  mg/L,  $T=298-318$  K,  $pH=6.0$ ,  $m=2$  mg,  $V=100$  mL) (a) the pseudo-first-order model; (b) the pseudo-second-order model; (c) the intra-particle diffusion model; (d) the Langmuir model; (e) the Freundlich model; (f) the linear plot of  $\ln K_0$  versus  $1/T$  at three different temperatures.

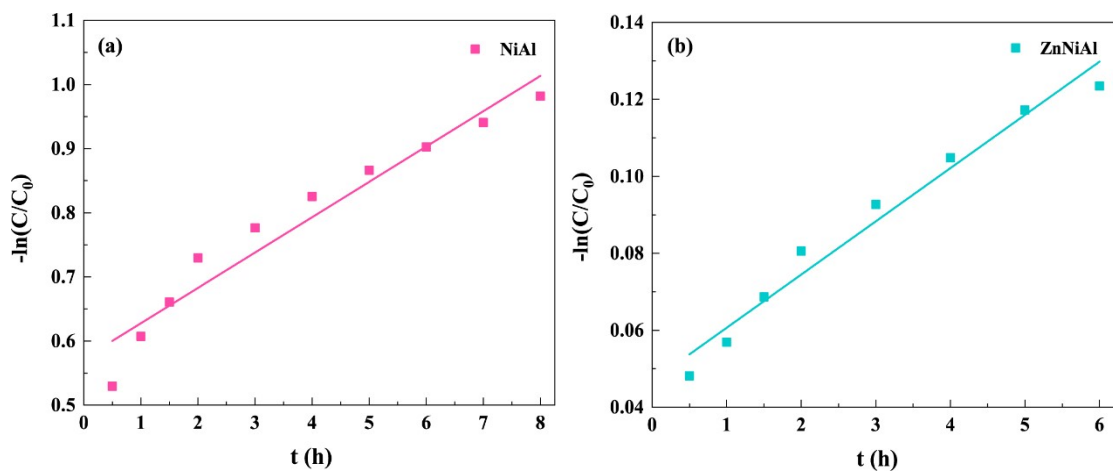

Fig. S5 The rate constants ( $k$ ) of U(VI) photoreduction on NiAl and ZnNiAl.

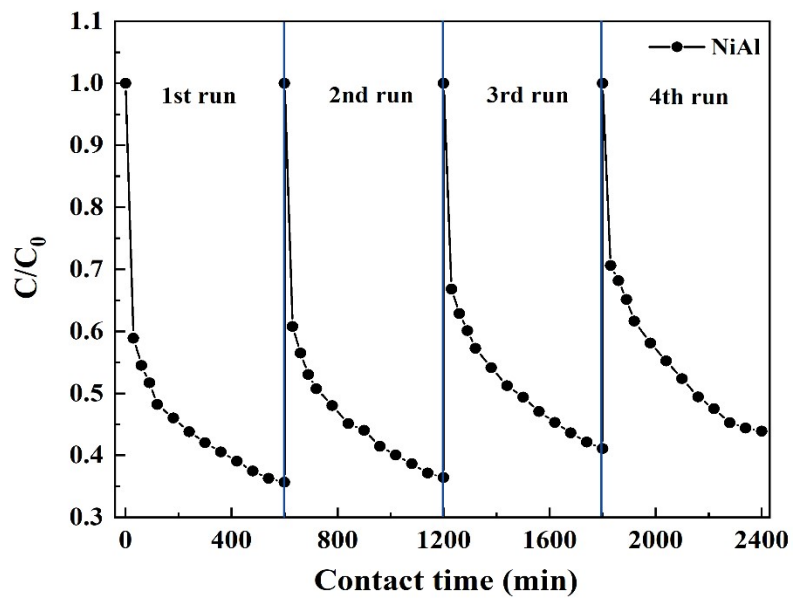

Fig. S6 The recyclability tests of visible-light driven photocatalytic activity for U(VI) over NiAl.



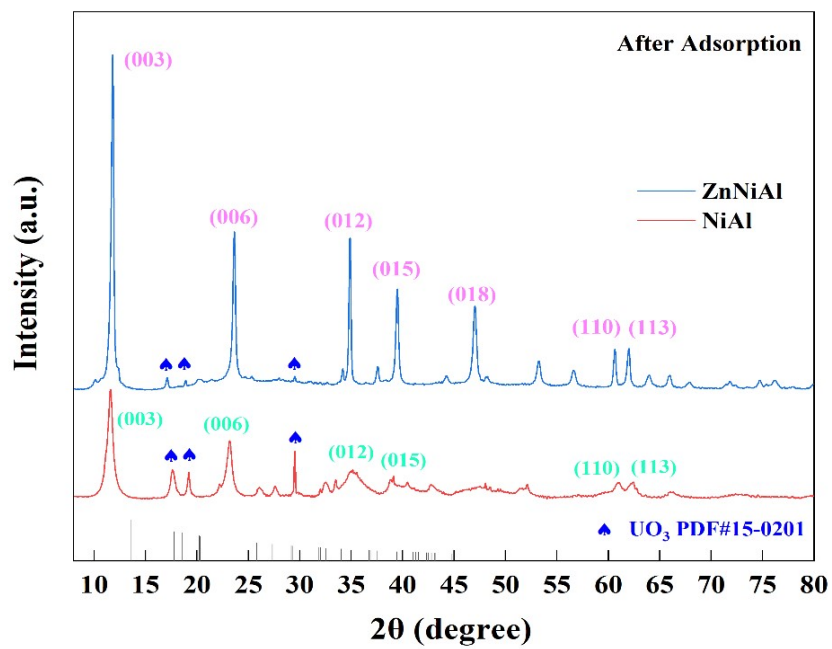

Fig. S7 The XRD spectra of NiAl and ZnNiAl after adsorption.

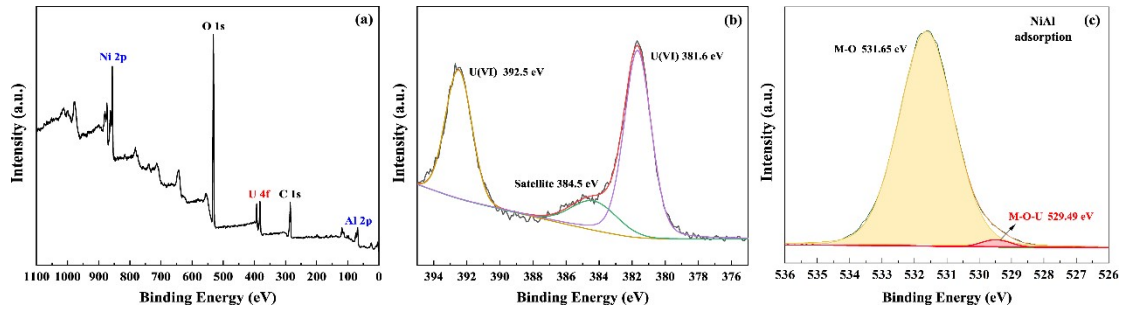

Fig. S8 The XPS survey, U4f and O1s spectra of NiAl-LDHs after adsorption.
